# Supplementary material
Source: publisher figshare collection journal article supplement (https://gsajournals.figshare.com/ndownloader/files/15204134)
Supplement: Supplementary file 1 [file 15204134]

**Table S5** Comparison between the prediction of individual plant values based on their half-sib family means and the genomic prediction of the individuals for organic matter (OM), crude protein (CP), *in vitro* digestibility of organic matter (IVD), leaf dry matter (LDM), regrowth capacity (RC), and percentage of leaf blade (PLB).

| Model | OM | CP | IVD | LDM | RC | PLB |
| --- | --- | --- | --- | --- | --- | --- |
| Prediction of  individuals | 0.3466 | 0.2642 | 0.3085 | 0.1786 | 0.2731 | 0.2628 |
| Only maternal  effects | 0.0758 | 0.0478 | 0.0552 | 0.1843 | 0.0668 | 0.0452 |
